# Supplementary material for: Effects of cardiovascular exercise early after stroke: systematic review and meta-analysis
Source: PubMed Central journal article supplement (PMC3495034; doi:10.1186/1471-2377-12-45), 2012-06-22

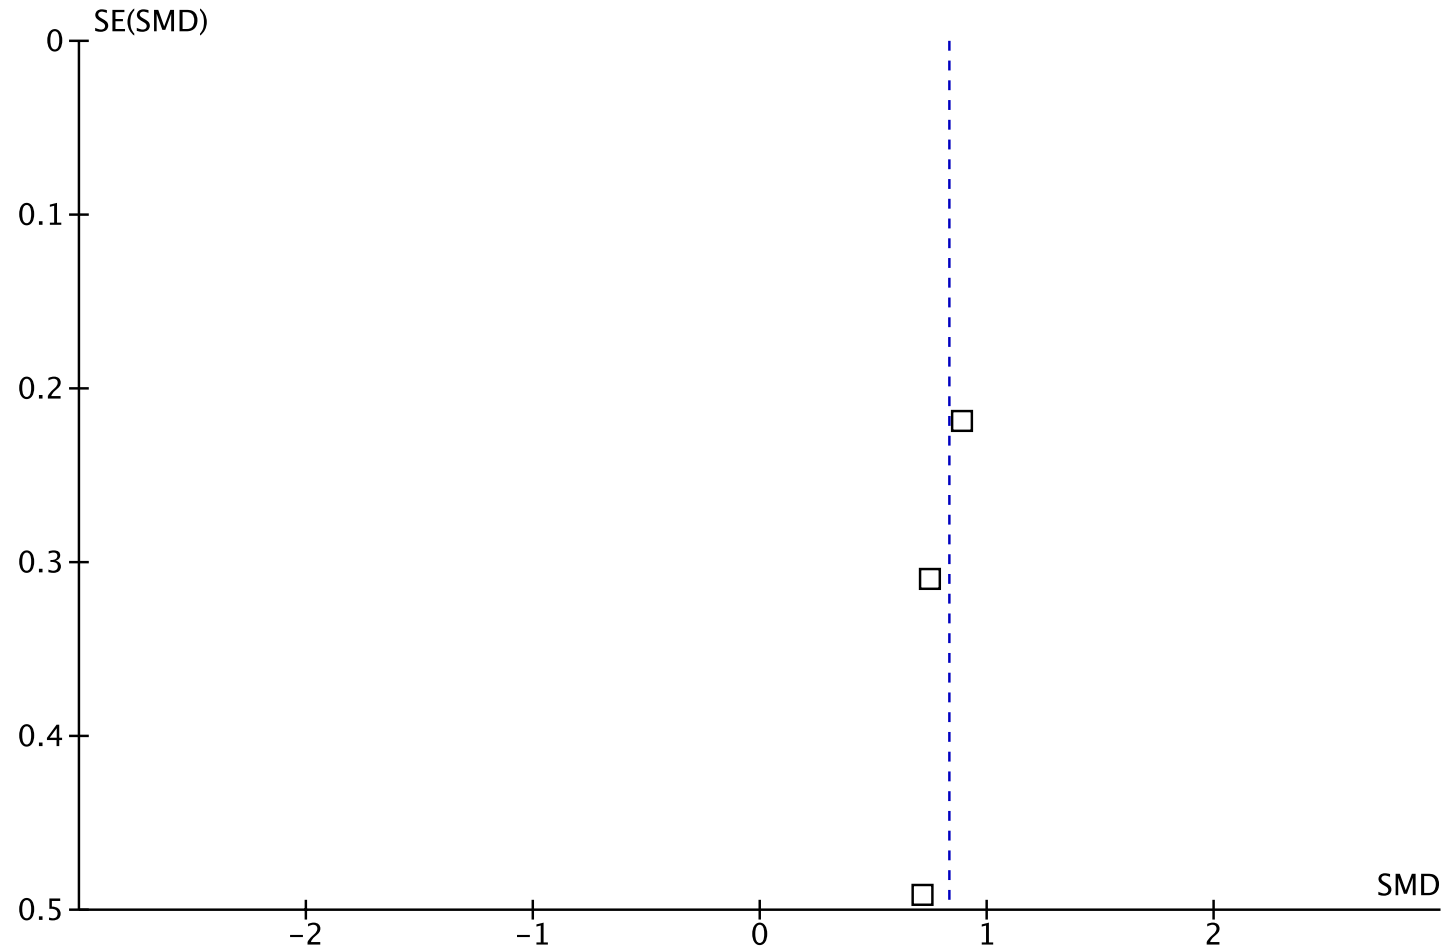

Supplement: 1471-2377-12-45-S2.pdf [file 1471-2377-12-45-S2.pdf]
